# Supplementary material
Source: PubMed Central journal article supplement (PMC5980379)
Supplement: KONI_A_1432328_SM9655.pdf [file KONI_A_1432328_SM9655.pdf]

## **SUPPLEMENTAL ONLINE MATERIAL**

**Title:** Restricted T cell receptor repertoire in CLL-like monoclonal B cell lymphocytosis and early stage CLL

**Authors:** Gonzalo Blanco, Anna Vardi, Anna Puiggros, Andrea Gómez-Llonín, Manuel Muro, María Rodríguez-Rivera, Evangelia Stalika, Eugenia Abella, Eva Gimeno, Manuela López-Sánchez, Alicia Senín, Xavier Calvo, Pau Abrisqueta, Francesc Bosch, Ana Ferrer, Kostas Stamatopoulos and Blanca Espinet

| Gene          | All clonotypes |              |       |           | Expanded clonotypes |           |       |           |
|---------------|----------------|--------------|-------|-----------|---------------------|-----------|-------|-----------|
|               | MBL            |              | CLL   |           | MBL                 |           | CLL   |           |
|               | Freq.          | Range        | Freq. | Range     | Freq.               | Range     | Freq. | Range     |
| TRBV10-3      | 15.43          | (3.45-31.25) | 11.64 | (0-21.74) | 13.11               | (0-33.33) | 11.94 | (0-33.33) |
| TRBV6-1       | 9.50           | (0-34.62)    | 10.05 | (0-25.00) | 11.48               | (0-50.00) | 10.45 | (0-33.33) |
| TRBV28        | 7.72           | (0-12.82)    | 8.47  | (0-18.52) | 3.28                | (0-12.50) | 4.48  | (0-14.29) |
| TRBV27        | 7.42           | (0-17.24)    | 6.88  | (0-16.67) | 9.84                | (0-33.33) | 10.45 | (0-33.33) |
| TRBV6-2/6-3   | 7.12           | (0-14.29)    | 3.17  | (0-9.38)  | 8.2                 | (0-50.00) | ND    | NA        |
| TRBV19        | 6.53           | (0-12.50)    | 10.05 | (0-21.74) | 8.2                 | (0-25.00) | 13.43 | (0-22.22) |
| TRBV20-1      | 5.93           | (0-17.86)    | 8.47  | (0-14.81) | 3.28                | (0-16.67) | 13.43 | (0-33.33) |
| TRBV6-6       | 5.34           | (0-20.83)    | 4.23  | (0-16.67) | 9.84                | (0-33.33) | 2.99  | (0-20.00) |
| TRBV24        | 5.04           | (0-17.65)    | 5.29  | (0-50.00) | 6.56                | (0-16.67) | 5.97  | (0-100)   |
| TRBV6-5       | 4.45           | (0-9.68)     | 6.35  | (0-20.00) | 6.56                | (0-50.00) | 1.49  | (0-8.33)  |
| TRBV2         | 4.45           | (0-11.54)    | 4.23  | (0-12.00) | 4.92                | (0-50.00) | 4.48  | (0-16.67) |
| TRBV7-9       | 3.86           | (0-12.90)    | 4.23  | (0-33.33) | 3.28                | (0-50.00) | 5.97  | (0-60.00) |
| TRBV29-1      | 2.67           | (0-5.13)     | 3.17  | (0-50.00) | 1.64                | (0-33.33) | 1.49  | (0-10.00) |
| TRBV7-8       | 2.37           | (0-6.45)     | 2.12  | (0-8.33)  | ND                  | NA        | 1.49  | (0-8.33)  |
| TRBV12-3/12-4 | 1.78           | (0-5.88)     | 5.29  | (0-15.38) | 3.28                | (0-16.67) | 4.48  | (0-20.00) |
| TRBV7-2       | 1.78           | (0-10.34)    | 1.06  | (0-3.70)  | 1.64                | (0-25.00) | 2.99  | (0-20.00) |
| TRBV12-5      | 1.48           | (0-6.25)     | 1.59  | (0-8.33)  | 1.64                | (0-50.00) | ND    | NA        |
| TRBV11-2      | 1.19           | (0-4.76)     | 0.53  | (0-8.33)  | 1.64                | (0-14.29) | ND    | NA        |
| TRBV5-1       | 1.19           | (0-6.25)     | ND    | NA        | ND                  | NA        | ND    | NA        |
| TRBV14        | 0.89           | (0-6.25)     | 0.53  | (0-3.85)  | 1.64                | (0-11.11) | ND    | NA        |
| TRBV5-4       | 0.59           | (0-4.17)     | ND    | NA        | ND                  | NA        | ND    | NA        |
| TRBV30        | 0.59           | (0-4.76)     | 1.06  | (0-4.00)  | ND                  | NA        | 2.99  | (0-14.29) |
| TRBV15        | 0.59           | (0-4.17)     | ND    | NA        | ND                  | NA        | ND    | NA        |
| TRBV6-4       | 0.59           | (0-4.17)     | ND    | NA        | ND                  | NA        | ND    | NA        |
| TRBV11-1      | 0.30           | (0-4.17)     | ND    | NA        | ND                  | NA        | ND    | NA        |
| TRBV6-9       | 0.30           | (0-3.45)     | ND    | NA        | ND                  | NA        | ND    | NA        |
| TRBV13        | 0.30           | (0-3.23)     | ND    | NA        | ND                  | NA        | ND    | NA        |
| TRBV5-5       | 0.30           | (0-3.13)     | ND    | NA        | ND                  | NA        | ND    | NA        |
| TRBV6-8       | 0.30           | (0-4.76)     | ND    | NA        | ND                  | NA        | ND    | NA        |
| TRBV10-2      | ND             | NA           | 0.53  | (0-3.33)  | ND                  | NA        | ND    | NA        |
| TRBV18        | ND             | NA           | 0.53  | (0-4.00)  | ND                  | NA        | 1.49  | (0-14.29) |
| TRBV7-6       | ND             | NA           | 0.53  | (0-3.13)  | ND                  | NA        | ND    | NA        |

**Table S1.** TRBV gene repertoire of the CD4<sup>+</sup> T cell fraction when all clonotypes or only expanded clonotypes were considered. The frequencies (%) of all detected genes are shown for each case. Freq.: frequency; ND: not detected; NA: not applicable.

| Gene                 | All clonotypes |           |       |           | Expanded clonotypes |           |       |           |
|----------------------|----------------|-----------|-------|-----------|---------------------|-----------|-------|-----------|
|                      | MBL            |           | CLL   |           | MBL                 |           | CLL   |           |
|                      | Freq.          | Range     | Freq. | Range     | Freq.               | Range     | Freq. | Range     |
| TRBV6-5              | 10.99          | (0-29.17) | 11.28 | (0-40.00) | 12.24               | (0-40.00) | 14.47 | (0-50.00) |
| TRBV10-3             | 10.64          | (0-22.22) | 9.23  | (0-18.18) | 14.29               | (0-33.33) | 6.58  | (0-20.00) |
| TRBV28               | 9.22           | (0-33.33) | 7.69  | (0-30.00) | 12.24               | (0-100)   | 3.95  | (0-33.33) |
| TRBV6-2 or TRBV6-3   | 7.80           | (0-28.57) | 8.21  | (0-22.22) | 7.14                | (0-33.33) | 6.58  | (0-50.00) |
| TRBV27               | 7.80           | (0-17.39) | 8.21  | (0-25.00) | 9.18                | (0-20.00) | 11.84 | (0-40.00) |
| TRBV7-9              | 7.45           | (0-25.00) | 4.62  | (0-15.38) | 8.16                | (0-28.57) | 9.21  | (0-66.67) |
| TRBV19               | 7.09           | (0-28.57) | 11.28 | (0-26.67) | 3.06                | (0-14.29) | 9.21  | (0-33.33) |
| TRBV6-1              | 5.67           | (0-23.53) | 5.13  | (0-25.00) | 5.10                | (0-20.00) | 2.63  | (0-25.00) |
| TRBV12-3 or TRBV12-4 | 3.90           | (0-18.18) | 2.05  | (0-10.00) | 2.04                | (0-14.29) | 1.32  | (0-16.67) |
| TRBV6-6              | 3.90           | (0-16.67) | 5.64  | (0-33.33) | 2.04                | (0-33.33) | 6.58  | (0-50.00) |
| TRBV20-1             | 3.90           | (0-20.00) | 7.69  | (0-22.73) | 4.08                | (0-50.00) | 10.53 | (0-33.33) |
| TRBV24               | 3.55           | (0-11.11) | 5.13  | (0-16.67) | 6.12                | (0-33.33) | 5.26  | (0-28.57) |
| TRBV2                | 3.19           | (0-11.76) | 3.08  | (0-16.67) | 3.06                | (0-14.29) | 2.63  | (0-25.00) |
| TRBV29-1             | 2.48           | (0-8.33)  | 1.03  | (0-6.25)  | 1.02                | (0-14.29) | ND    | NA        |
| TRBV7-8              | 2.13           | (0-11.76) | 1.54  | (0-5.88)  | 3.06                | (0-20.00) | 1.32  | (0-16.67) |
| TRBV14               | 1.42           | (0-11.11) | 1.03  | (0-7.69)  | 1.02                | (0-14.29) | 1.32  | (0-14.29) |
| TRBV12-5             | 1.42           | (0-14.29) | ND    | NA        | 2.04                | (0-14.29) | ND    | NA        |
| TRBV5-1              | 1.42           | (0-5.26)  | ND    | NA        | 2.04                | (0-14.29) | ND    | NA        |
| TRBV7-2              | 1.42           | (0-11.11) | 1.03  | (0-13.33) | ND                  | NA        | 2.63  | (0-18.18) |
| TRBV6-4              | 1.06           | (0-18.18) | ND    | NA        | ND                  | NA        | ND    | NA        |
| TRBV18               | 0.71           | (0-11.11) | ND    | NA        | ND                  | NA        | ND    | NA        |
| TRBV7-7              | 0.71           | (0-9.09)  | ND    | NA        | ND                  | NA        | ND    | NA        |
| TRBV11-2             | 0.71           | (0-5.88)  | 1.54  | (0-10.00) | 1.02                | (0-14.29) | 1.32  | (0-16.67) |
| TRBV30               | 0.71           | (0-11.11) | 0.51  | (0-10.00) | 1.02                | (0-20.00) | ND    | NA        |
| TRBV7-6              | 0.35           | (0-3.13)  | 1.03  | (0-6.67)  | ND                  | NA        | 1.32  | (0-9.09)  |
| TRBV15               | 0.35           | (0-5.26)  | 1.03  | (0-7.69)  | ND                  | NA        | ND    | NA        |
| TRBV4-3              | ND             | NA        | 0.51  | (0-3.45)  | ND                  | NA        | ND    | NA        |
| TRBV10-2             | ND             | NA        | 0.51  | (0-3.45)  | ND                  | NA        | ND    | NA        |
| TRBV11-3             | ND             | NA        | 0.51  | (0-10.00) | ND                  | NA        | 1.32  | (0-25.00) |
| TRBV5-4              | ND             | NA        | 0.51  | (0-11.11) | ND                  | NA        | ND    | NA        |

**Table S2.** TRBV gene repertoire of the CD8<sup>+</sup> T cell fraction when all clonotypes or only expanded clonotypes were considered. The frequencies (%) of all detected genes are shown for each case. Freq.: frequency; ND: not detected; NA: not applicable.

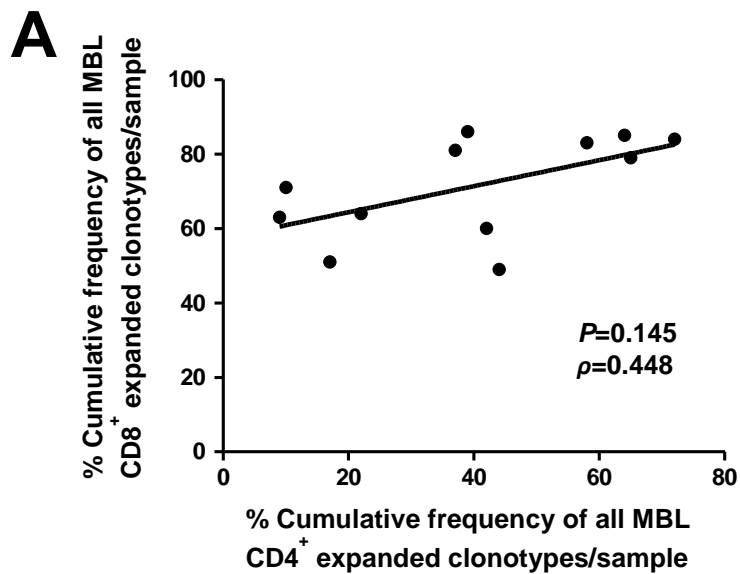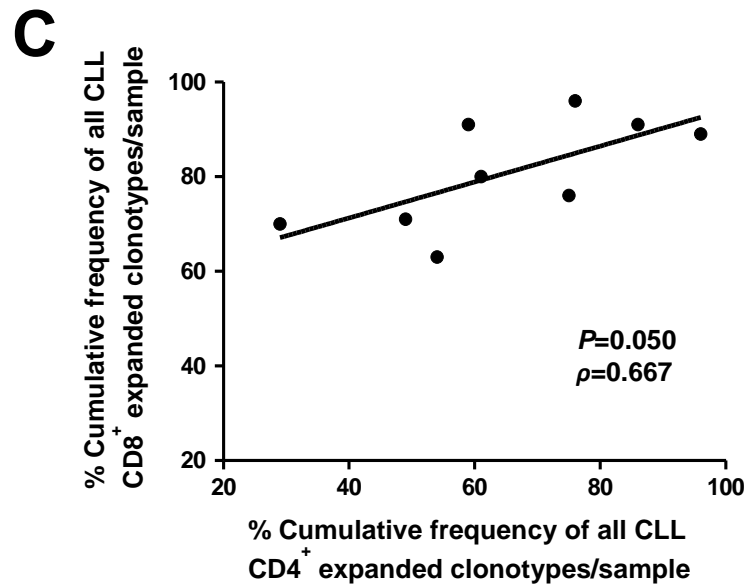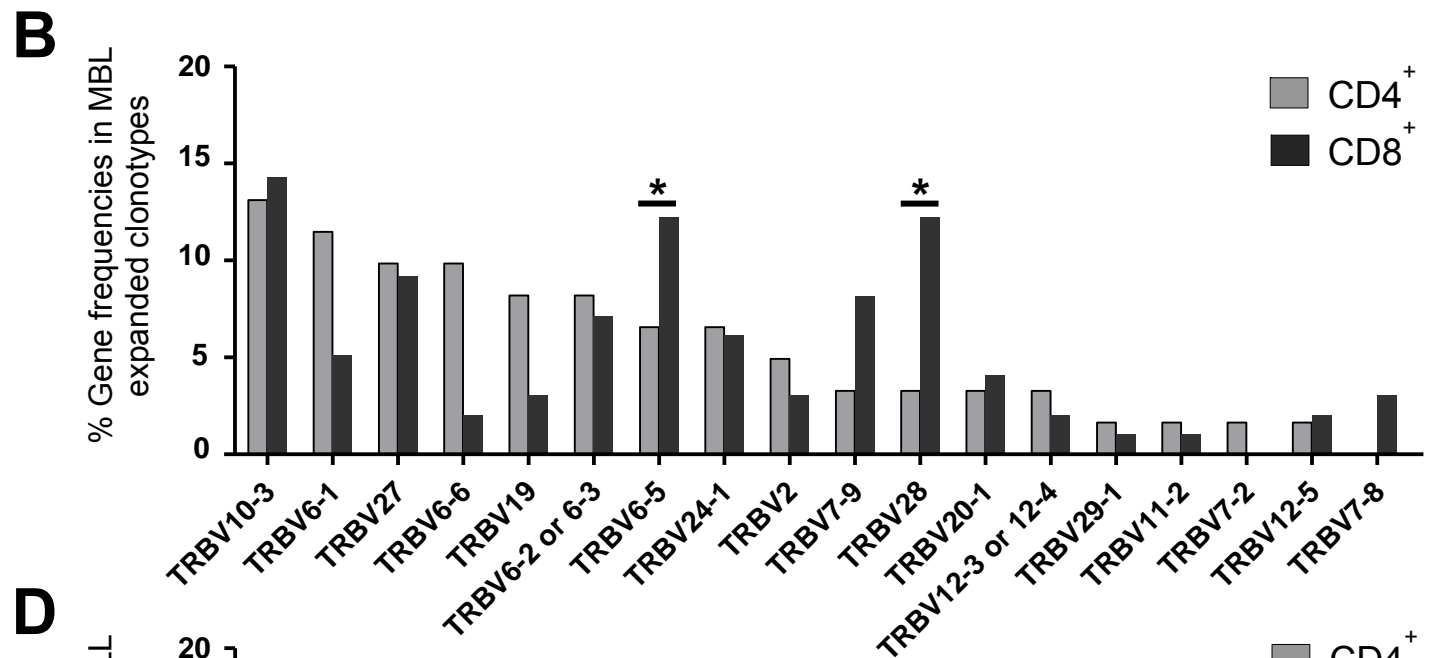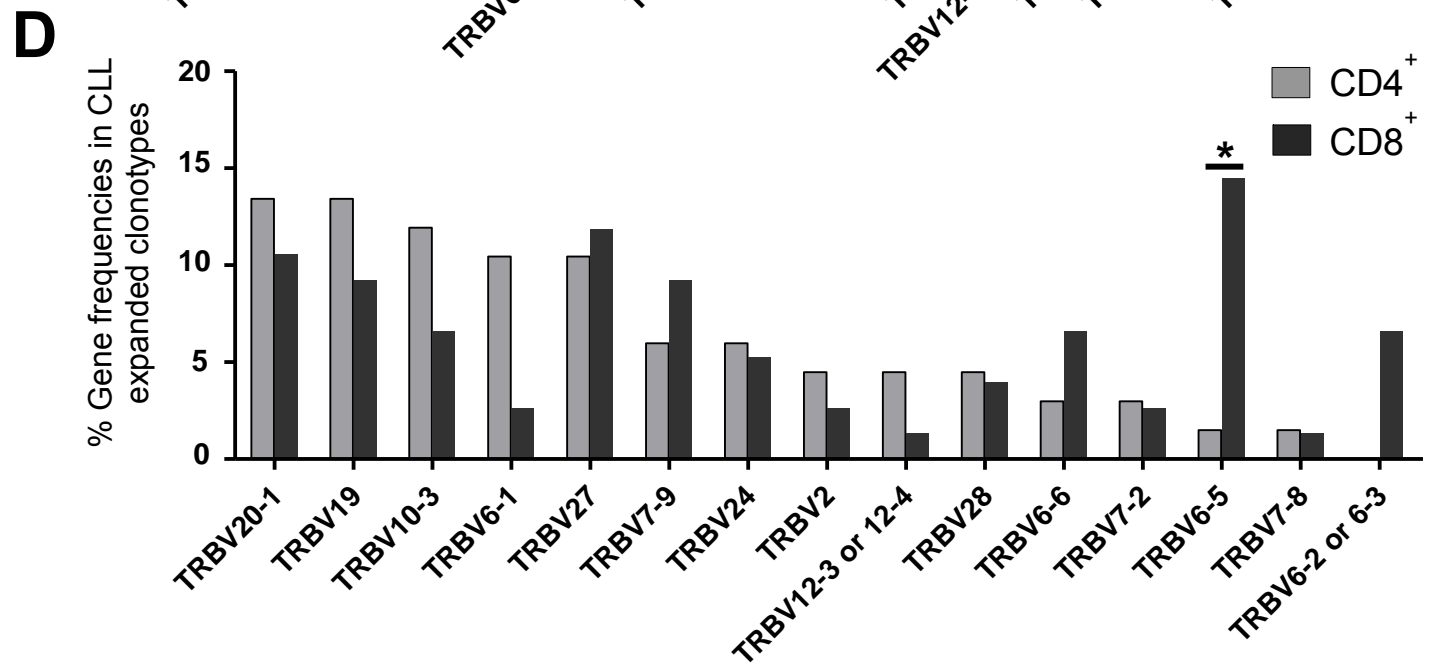

**Figure S1.** Comparative study of the TR repertoire between CD4<sup>+</sup> and CD8<sup>+</sup> T cells in MBL (A and B) and CLL (C and D). Correlations between the percentage cumulative frequency of all expanded CD4<sup>+</sup> and CD8<sup>+</sup> T cell clonotypes/sample are shown for MBL (A) and CLL (C).  $\rho$ : Spearman's rho correlation coefficient. The TRBV gene repertoire of the CD4<sup>+</sup> and CD8<sup>+</sup> expanded T cell clonotypes are compared for MBL (B) and CLL (D). Significant differences ( $P<0.05$ ) are shown with \*.
